# Supplementary material for: Lactobacillus gasseri NK109 and Its Supplement Alleviate Cognitive Impairment in Mice by Modulating NF-κB Activation, BDNF Expression, and Gut Microbiota Composition
Source: MDPI journal article supplement (doi:10.3390/nu15030790), 2023-02-03
Supplement: s1 [file nutrients-2148118-supplementary tables.pdf › nutrients-2148118-supplementary tables.pdf]

Table S1. Clinical characteristics of study participants

| Volunteer |         | Age (Gender)           | CERAD-K  | Body mass index <sup>1)</sup> | Medicines within 3 months <sup>2)</sup> |
|-----------|---------|------------------------|----------|-------------------------------|-----------------------------------------|
| healthy   | Mean±SD | 60.0±6.6 <sup>3)</sup> | 75.3±1.5 | 23.9±1.4                      |                                         |
|           | Each    | 53 (F)                 | 75       | 25.4                          | No                                      |
|           |         | 61 (F)                 | 74       | 23.6                          | No                                      |
|           |         | 66 (M)                 | 77       | 22.7                          | No                                      |
| MCI       | Mean±SD | 65.3±4.2               | 59.3±6.4 | 26.0±3.3                      |                                         |
|           | Each    | 70 (M)                 | 52       | 22.2                          | No                                      |
|           |         | 64 (F)                 | 63       | 27.3                          | No                                      |
|           |         | 62 (F)                 | 63       | 28.5                          | No                                      |

<sup>1)</sup> Body mass index (BMI) BMI is defined as the body mass divided by the square of the body height, and is universally expressed in units of kg/m<sup>2</sup>, resulting from mass in kilograms and height in metres.

<sup>2)</sup> medications that can affect the gut microbiota, such as painkillers, anti-inflammatory drugs, and antibiotics for > 3 months. Acute gastrointestinal symptoms such as diarrhea and abdominal pain within the last week.

<sup>3)</sup> Indicated as mean ± SD.

Table S2. Primers for NK109 and 16S rRNA gene

|               | Primer                                                   |                                                            |
|---------------|----------------------------------------------------------|------------------------------------------------------------|
|               | Forward                                                  | Reverse                                                    |
| NK109 gene    | AGCGAGCTTGCCTAGATGAATTTG                                 | TCT TTT AAA CTC TAG ACA TGC GTC                            |
| 16S rRNA gene | TCGTCGGCAGCGTCAGATGTGTATAAG<br>AGACAGGTGCCAGCMGCCGCGGTAA | GTCTCGTGGGCTCGGAGATGTGTATAAG<br>AGACAGGGACTACHVGGGTWTCTAAT |

Table S3. Effects of NK109 and NS on the fecal microbiota composition at the phylum level in Ag mice

| Taxon Name           | mean ± SD <sup>1)</sup> |          |          |           |          |
|----------------------|-------------------------|----------|----------|-----------|----------|
|                      | Yg                      | YgS      | Ag       | AgN       | AgS      |
| Bacteroidetes        | 51.7±12.3               | 50.9±7.0 | 48.6±5.0 | 54.0±49.9 | 49.9±3.7 |
| Firmicutes           | 43.4±12.0               | 42.6±6.9 | 46.6±5.3 | 40.9±42.9 | 42.9±4.5 |
| Proteobacteria       | 2.7±1.7                 | 2.0±0.2  | 3.4±0.8  | 2.7±2.9   | 2.9±1.3  |
| Tenericutes          | 1.7±2.0                 | 1.6±0.9  | 0.4±0.2  | 1.1±1.1   | 1.1±0.9  |
| Actinobacteria       | 0.3±0.1                 | 0.1±0.1  | 0.9±0.5* | 0.4±0.5   | 0.5±0.3  |
| Cyanobacteria        | 0.1±0.2                 | 1.0±0.6  | 0.2±0.1  | 0.7±1.1   | 1.1±1.4  |
| Deferribacteres      | 0.1±0.1                 | 0.2±0.2  | 0.0±0.0  | 0.2±0.1   | 0.1±0.2  |
| Saccharibacteria TM7 | 0.0±0.0                 | 0.0±0.0  | 0.0±0.0  | 0.0±0.0   | 0.0±0.0  |
| Verrucomicrobia      | 0.0±0.0                 | 1.5±1.3  | 0.0±0.0  | 0.0±1.4   | 1.4±1.9  |
| Fusobacteria         | 0.0±0.0                 | 0.0±0.0  | 0.0±0.0  | 0.0±0.0   | 0.0±0.0  |

<sup>1)</sup>Mean ± SD

Table S4. Effects of NK109 and NS on the fecal microbiota composition at the family level in Ag mice

| Taxon Name          | mean $\pm$ SD <sup>1)</sup> |                |                |                |                            |
|---------------------|-----------------------------|----------------|----------------|----------------|----------------------------|
|                     | Yg                          | YgS            | Ag             | AgN            | AgS                        |
| Muribaculaceae      | 35.7 $\pm$ 10.8             | 37.7 $\pm$ 7.0 | 36.2 $\pm$ 3.1 | 31.2 $\pm$ 7.2 | 31.5 $\pm$ 4.7             |
| Lachnospiraceae     | 26.8 $\pm$ 12.4             | 28.1 $\pm$ 5.0 | 20.2 $\pm$ 6.8 | 21.5 $\pm$ 5.2 | 23.6 $\pm$ 4.0             |
| Lactobacillaceae    | 8.0 $\pm$ 6.0               | 1.1 $\pm$ 0.5  | 13.8 $\pm$ 5.2 | 8.1 $\pm$ 2.4  | 8.9 $\pm$ 4.3              |
| Rikenellaceae       | 6.3 $\pm$ 2.3               | 3.0 $\pm$ 1.3  | 2.0 $\pm$ 0.3  | 2.6 $\pm$ 1.3  | 4.7 $\pm$ 1.2              |
| Ruminococcaceae     | 6.0 $\pm$ 2.4               | 9.5 $\pm$ 2.3  | 6.2 $\pm$ 2.3  | 7.1 $\pm$ 1.9  | 7.3 $\pm$ 2.6              |
| Prevotellaceae      | 4.8 $\pm$ 3.0               | 4.7 $\pm$ 3.3  | 2.8 $\pm$ 1.6  | 12.5 $\pm$ 5.2 | 6.3 $\pm$ 4.3              |
| Bacteroidaceae      | 2.8 $\pm$ 1.5               | 2.7 $\pm$ 1.1  | 5.4 $\pm$ 1.9  | 5.7 $\pm$ 1.1  | 4.9 $\pm$ 1.5              |
| Christensenellaceae | 1.9 $\pm$ 0.5               | 2.7 $\pm$ 0.5  | 2.4 $\pm$ 0.7  | 1.9 $\pm$ 1.2  | 1.5 $\pm$ 1.3              |
| Odoribacteraceae    | 1.6 $\pm$ 1.3               | 1.7 $\pm$ 0.6  | 1.2 $\pm$ 0.4  | 0.6 $\pm$ 0.3  | 1.9 $\pm$ 1.3              |
| Acholeplasmataceae  | 1.5 $\pm$ 2.1               | 1.4 $\pm$ 1.0  | 0.2 $\pm$ 0.1  | 0.9 $\pm$ 0.8  | 0.7 $\pm$ 0.8              |
| Helicobacteraceae   | 1.0 $\pm$ 1.7               | 0.1 $\pm$ 0.1  | 1.2 $\pm$ 0.9  | 0.3 $\pm$ 0.2  | 1.3 $\pm$ 1.6              |
| Sutterellaceae      | 1.0 $\pm$ 1.3               | 0.8 $\pm$ 0.3  | 1.3 $\pm$ 0.7  | 1.3 $\pm$ 0.7  | 0.6 $\pm$ 0.4              |
| Desulfovibrionaceae | 0.5 $\pm$ 0.1               | 0.8 $\pm$ 0.3  | 0.7 $\pm$ 0.4  | 0.7 $\pm$ 0.3  | 0.6 $\pm$ 0.3              |
| Erysipelotrichaceae | 0.4 $\pm$ 0.5               | 0.8 $\pm$ 0.3  | 1.9 $\pm$ 1.1  | 1.3 $\pm$ 1.0  | 1.1 $\pm$ 1.1              |
| AC160630 f          | 0.3 $\pm$ 0.1               | 0.7 $\pm$ 0.4  | 0.6 $\pm$ 0.3  | 0.7 $\pm$ 0.8  | 0.5 $\pm$ 0.3              |
| Porphyromonadaceae  | 0.3 $\pm$ 0.2               | 0.5 $\pm$ 0.2  | 0.3 $\pm$ 0.1  | 0.7 $\pm$ 0.3  | 0.2 $\pm$ 0.2              |
| Coriobacteriaceae   | 0.2 $\pm$ 0.1               | 0.1 $\pm$ 0.1  | 0.3 $\pm$ 0.1  | 0.2 $\pm$ 0.1  | 0.5 $\pm$ 0.3              |
| Rhodospirillaceae   | 0.2 $\pm$ 0.1               | 0.3 $\pm$ 0.2  | 0.2 $\pm$ 0.1  | 0.3 $\pm$ 0.3  | 0.3 $\pm$ 0.3              |
| Dehalobacterium f   | 0.2 $\pm$ 0.1               | 0.3 $\pm$ 0.1  | 0.2 $\pm$ 0.1  | 0.2 $\pm$ 0.1  | 0.2 $\pm$ 0.1              |
| PAC000197 f         | 0.1 $\pm$ 0.3               | 0.2 $\pm$ 0.2  | 0.1 $\pm$ 0.1  | 0.2 $\pm$ 0.1  | 0.4 $\pm$ 0.4              |
| FR888536 f          | 0.1 $\pm$ 0.2               | 1.0 $\pm$ 0.6  | 0.2 $\pm$ 0.1  | 0.7 $\pm$ 0.4  | 1.1 $\pm$ 1.4              |
| Deferribacteraceae  | 0.1 $\pm$ 1                 | 0.2 $\pm$ 0.2  | 0.0 $\pm$ 0.0  | 0.2 $\pm$ 0.1  | 0.1 $\pm$ 0.2              |
| Mogibacterium f     | 0.1 $\pm$ 0.0               | 0.1 $\pm$ 0.0  | 0.1 $\pm$ 0.0  | 0.1 $\pm$ 0.0  | 0.1 $\pm$ 0.0              |
| Peptococcaceae      | 0.0 $\pm$ 0.0               | 0.0 $\pm$ 0.0  | 0.0 $\pm$ 0.0  | 0.0 $\pm$ 0.0  | 0.0 $\pm$ 0.0              |
| Bifidobacteriaceae  | 0.0 $\pm$ 0.0               | 0.0 $\pm$ 0.0  | 0.6 $\pm$ 0.4* | 0.2 $\pm$ 0.2  | 0.0 $\pm$ 0.0 <sup>#</sup> |

<sup>1)</sup>Mean  $\pm$  SD

Table S5. Effects of NK109 and NS on the fecal microbiota composition at the phylum level in Ag mice

| Taxon Name                  | mean $\pm$ SD <sup>1)</sup> |                |                |               |               |
|-----------------------------|-----------------------------|----------------|----------------|---------------|---------------|
|                             | Yg                          | YgS            | Ag             | AgN           | AgS           |
| Lactobacillus murinus group | 7.8 $\pm$ 5.9               | 0.4 $\pm$ 0.2  | 12.9 $\pm$ 5.0 | 5.8 $\pm$ 2.9 | 7.4 $\pm$ 3.7 |
| PAC001077 s                 | 6.2 $\pm$ 3.8               | 1.0 $\pm$ 0.8  | 0.8 $\pm$ 0.6  | 2.4 $\pm$ 1.6 | 8.3 $\pm$ 6.4 |
| PAC001070 s group           | 6.1 $\pm$ 5.7               | 5.9 $\pm$ 1.5  | 8.6 $\pm$ 2.2  | 5.8 $\pm$ 4.3 | 4.2 $\pm$ 3.8 |
| PAC001093 s                 | 3.5 $\pm$ 5.4               | 0.3 $\pm$ 0.7  | 0.5 $\pm$ 1.0  | 0.1 $\pm$ 0.2 | 2.6 $\pm$ 3.9 |
| PAC002450 s                 | 3.0 $\pm$ 4.1               | 10.4 $\pm$ 1.8 | 5.6 $\pm$ 3.1  | 4.4 $\pm$ 3.6 | 1.1 $\pm$ 2.5 |
| PAC001060 s                 | 2.5 $\pm$ 1.4               | 0.1 $\pm$ 0.2  | 0.4 $\pm$ 0.3  | 0.4 $\pm$ 0.7 | 1.4 $\pm$ 0.8 |
| PAC001383 s                 | 2.4 $\pm$ 2.8               | 0.1 $\pm$ 0.1  | 0.1 $\pm$ 0.1  | 0.7 $\pm$ 0.9 | 0.7 $\pm$ 1.1 |
| KE159538 s                  | 2.0 $\pm$ 2.2               | 1.5 $\pm$ 1.7  | 0.4 $\pm$ 0.5  | 1.0 $\pm$ 0.9 | 0.4 $\pm$ 0.7 |
| PAC001071 s                 | 1.8 $\pm$ 1.6               | 0.0 $\pm$ 0.0  | 0.1 $\pm$ 0.0  | 0.2 $\pm$ 0.2 | 1.7 $\pm$ 1.6 |
| PAC002443 s                 | 1.8 $\pm$ 1.5               | 0.4 $\pm$ 0.3  | 0.3 $\pm$ 0.6  | 0.8 $\pm$ 0.7 | 0.3 $\pm$ 0.2 |
| PAC002399 s                 | 1.8 $\pm$ 0.5               | 0.6 $\pm$ 0.5  | 0.6 $\pm$ 0.7  | 0.4 $\pm$ 0.2 | 0.6 $\pm$ 0.3 |
| PAC002444 s                 | 1.7 $\pm$ 0.9               | 1.3 $\pm$ 1.1  | 0.4 $\pm$ 0.2  | 0.2 $\pm$ 0.3 | 0.6 $\pm$ 0.5 |
| Muribaculum intestinale     | 1.6 $\pm$ 1.6               | 1.0 $\pm$ 0.9  | 2.8 $\pm$ 0.6  | 2.3 $\pm$ 1.4 | 0.4 $\pm$ 0.2 |
| PAC001080 s                 | 1.5 $\pm$ 2.1               | 1.4 $\pm$ 1.0  | 0.2 $\pm$ 0.2  | 0.9 $\pm$ 0.8 | 0.6 $\pm$ 0.8 |
| PAC002400 s                 | 1.4 $\pm$ 1.1               | 1.2 $\pm$ 0.4  | 0.7 $\pm$ 0.2  | 0.6 $\pm$ 0.3 | 1.0 $\pm$ 0.6 |

|                   |         |         |         |         |         |
|-------------------|---------|---------|---------|---------|---------|
| PAC000198 s       | 1.4±1.2 | 0.6±0.7 | 0.4±0.8 | 0.2±0.1 | 0.4±0.3 |
| PAC001065 s group | 1.2±0.9 | 0.1±0.0 | 0.4±0.3 | 0.1±0.1 | 0.4±0.4 |
| AB606328 s        | 1.1±1.3 | 0.9±0.3 | 0.4±0.2 | 0.4±0.2 | 1.1±0.8 |
| KE159571 s        | 1.1±1.5 | 0.0±0.0 | 0.0±0.0 | 0.0±0.1 | 0.0±0.0 |
| PAC002481 s       | 1.1±0.6 | 1.4±0.4 | 0.9±0.4 | 0.7±0.3 | 1.2±1.0 |
| PAC001696 s       | 1.0±2.1 | 4.3±2.8 | 0.5±1.3 | 0.0±0.0 | 1.7±4.0 |
| PAC001128 s       | 1.0±0.4 | 0.3±0.1 | 0.7±0.3 | 0.3±0.2 | 0.5±0.5 |
| PAC001066 s       | 1.0±0.3 | 0.6±0.2 | 0.2±0.2 | 1.1±0.4 | 0.5±0.2 |
| PAC001515 s       | 1.0±0.9 | 1.0±1.2 | 0.2±0.3 | 0.1±0.2 | 0.6±1.3 |
| PAC002441 s group | 0.9±0.6 | 0.6±0.3 | 0.5±0.1 | 0.6±0.2 | 0.5±0.2 |

<sup>1)</sup>Mean ± SD

Table S6. The relationship between differentially enriched gut microbiota composition and spontaneous alteration score in YMT in Ag mice (in the network analysis)

|        | Spontaneous alteration score in Y-maze task | R       | R <sup>2</sup> | P-value |         | Spontaneous alteration score in Y-maze task | R       | R <sup>2</sup> | P-value |
|--------|---------------------------------------------|---------|----------------|---------|---------|---------------------------------------------|---------|----------------|---------|
| Phylum | Bacteroidetes                               | 0.1061  | 0.0113         | 0.5769  | species | Lactobacillus murinus group                 | -0.5401 | 0.2917         | 0.0021  |
|        | Firmicutes                                  | -0.1032 | 0.0107         | 0.5874  |         | PAC002443 s                                 | 0.497   | 0.2470         | 0.0052  |
|        | Actinobacteria                              | -0.5982 | 0.3578         | 0.0005  |         | PAC002444 s                                 | 0.3888  | 0.1512         | 0.0337  |
| Family | Muribaculaceae                              | -0.1368 | 0.0187         | 0.4712  |         | PAC001066 s                                 | 0.5784  | 0.3345         | 0.0008  |
|        | Lachnospiraceae                             | 0.3368  | 0.1134         | 0.0688  |         | PAC002447 s                                 | -0.4414 | 0.1948         | 0.0146  |
|        | Lactobacillaceae                            | -0.5606 | 0.3143         | 0.0013  |         | PAC001119 s                                 | 0.4182  | 0.1749         | 0.0215  |
|        | Rikenellaceae                               | 0.4272  | 0.1825         | 0.0186  |         | PAC001688_s group                           | 0.4202  | 0.1766         | 0.0208  |
|        | Ruminococcaceae                             | 0.3850  | 0.1482         | 0.0356  |         | PAC001382 s                                 | 0.4007  | 0.1606         | 0.0282  |
|        | Bacteroidaceae                              | -0.3446 | 0.1187         | 0.0622  |         | PAC001684 s                                 | 0.4827  | 0.2330         | 0.0069  |
|        | Odoribacteraceae                            | 0.0286  | 0.0008         | 0.8807  |         | PAC001666 s                                 | 0.4276  | 0.1828         | 0.0184  |
|        | Erysipelotrichaceae                         | -0.4636 | 0.2149         | 0.0099  |         | PAC001558 s                                 | -0.5133 | 0.2635         | 0.0037  |
|        | Coriobacteriaceae                           | -0.2678 | 0.0717         | 0.1525  |         | PAC001668 s                                 | 0.3931  | 0.1545         | 0.0316  |
|        | Bifidobacteriaceae                          | -0.5992 | 0.3590         | 0.0005  |         | PAC001267 s                                 | -0.4165 | 0.1735         | 0.022   |
|        | Peptostreptococcaceae                       | -0.0633 | 0.0040         | 0.7399  |         | KE159714_s group                            | -0.4344 | 0.1887         | 0.0164  |
| Genus  | Lactobacillus                               | -0.5609 | 0.3146         | 0.0013  |         | Lactobacillus uc                            | -0.6899 | 0.4760         | <0.0001 |
|        | Alistipes                                   | 0.4534  | 0.2056         | 0.0119  |         | AB599946 s                                  | -0.5511 | 0.3037         | 0.0016  |
|        | LLKB_g                                      | 0.3416  | 0.1167         | 0.0647  |         | PAC001199 s                                 | 0.3943  | 0.1555         | 0.0311  |
|        | PAC000186_g                                 | -0.5416 | 0.2933         | 0.002   |         | KB822463 s                                  | -0.7004 | 0.4906         | <0.0001 |
|        | Bacteroides                                 | -0.3446 | 0.1187         | 0.0622  |         | Bifidobacterium pseudolongum group          | -0.6015 | 0.3618         | 0.0004  |
|        | Oscillibacter                               | 0.4118  | 0.1696         | 0.0237  |         | PAC001589 s                                 | -0.5161 | 0.2664         | 0.0035  |
|        | PAC000664_g                                 | -0.0399 | 0.0016         | 0.8343  |         | PAC001266 s                                 | -0.6567 | 0.4313         | <0.0001 |
|        | KE159571_g                                  | 0.255   | 0.0650         | 0.1738  |         | PAC001043_g uc                              | -0.5801 | 0.3365         | 0.0008  |
|        | Odoribacter                                 | 0.02849 | 0.0008         | 0.8812  |         | Lactobacillus intestinalis                  | -0.5801 | 0.3365         | 0.0008  |
|        | PAC001092_g                                 | 0.2355  | 0.0555         | 0.2104  |         | PAC001396_s                                 | -0.6622 | 0.4385         | <0.0001 |
|        | PAC001112_g                                 | -0.2443 | 0.0597         | 0.1933  |         | PAC001294_s                                 | -0.3945 | 0.1556         | 0.031   |
|        | PAC001066_g                                 | 0.5794  | 0.3357         | 0.0008  |         | HQ740432_s                                  | -0.4342 | 0.1885         | 0.0165  |
|        | PAC000692_g                                 | 0.1377  | 0.0190         | 0.4682  |         | PAC001528_s                                 | -0.4147 | 0.1720         | 0.0227  |
|        | Agathobaculum                               | 0.1754  | 0.0308         | 0.3539  |         | PAC002299_s                                 | -0.4755 | 0.2261         | 0.0079  |
|        | Eubacterium_g17                             | 0.3643  | 0.1327         | 0.0478  |         | PAC001488_s group                           | -0.5447 | 0.2967         | 0.0019  |

|  |                 |         |        |         |  |                            |         |        |         |
|--|-----------------|---------|--------|---------|--|----------------------------|---------|--------|---------|
|  | Acetatifactor   | -0.0252 | 0.0006 | 0.895   |  | Clostridium celatum group  | -0.7739 | 0.5989 | <0.0001 |
|  | PAC001043_g     | 0.3676  | 0.1351 | 0.0457  |  | PAC001271_s                | -0.493  | 0.2430 | 0.0056  |
|  | PAC001199_g     | 0.3059  | 0.0936 | 0.1002  |  | Clostridium uc             | -0.7017 | 0.4924 | <0.0001 |
|  | Clostridium g21 | -0.1248 | 0.0156 | 0.5111  |  | DQ815552_s                 | -0.5526 | 0.3054 | 0.0015  |
|  | PAC000661_g     | -0.0656 | 0.0043 | 0.7307  |  | DQ815878_s                 | -0.6489 | 0.4211 | 0.0001  |
|  | Dubosiella      | -0.06   | 0.0036 | 0.7527  |  | FJ881246_s                 | -0.5212 | 0.2716 | 0.0031  |
|  | PAC001091_g     | -0.3485 | 0.1215 | 0.0591  |  | Lactococcus garvieae group | -0.7121 | 0.5071 | <0.0001 |
|  | PAC001516_g     | -0.0998 | 0.0100 | 0.6     |  | PAC000686_s                | -0.5168 | 0.2671 | 0.0035  |
|  | KE159605_g      | -0.2771 | 0.0768 | 0.1383  |  | PAC001090_s                | -0.489  | 0.2391 | 0.0061  |
|  | PAC001266_g     | -0.6565 | 0.4310 | <0.0001 |  | PAC001092_g uc             | -0.4146 | 0.1719 | 0.0227  |
|  | Bifidobacterium | -0.5992 | 0.3590 | 0.0005  |  | PAC001553_s group          | -0.5539 | 0.3068 | 0.0015  |
|  | PAC001116_g     | -0.493  | 0.2430 | 0.0056  |  | PAC001588_s                | -0.6109 | 0.3732 | 0.0003  |
|  | Roseburia       | -0.4205 | 0.1768 | 0.0207  |  | PAC001665_s                | -0.6387 | 0.4079 | 0.0001  |
|  | PAC001588_g     | 0.01566 | 0.0002 | 0.9345  |  | PAC001902_s                | -0.5875 | 0.3452 | 0.0006  |
|  | Lactococcus     | -0.7439 | 0.5534 | <0.0001 |  |                            |         |        |         |
|  | PAC001090_g     | -0.489  | 0.2391 | 0.0061  |  |                            |         |        |         |

Table S7. The relationship between differentially enriched gut microbiota composition and exploration score in NORT in Ag mice (in the network analysis)

|        | Exploration score in NORT | R        | R^2    | P-value |         | Exploration score in NORT          | R       | R^2    | P-value |
|--------|---------------------------|----------|--------|---------|---------|------------------------------------|---------|--------|---------|
| Phylum | Bacteroidetes             | 0.1673   | 0.0280 | 0.3768  | species | KE159538_s                         | 0.4289  | 0.1840 | 0.018   |
|        | Firmicutes                | -0.1879  | 0.0353 | 0.3202  |         | PAC002443_s                        | 0.4004  | 0.1603 | 0.0283  |
|        | Actinobacteria            | -0.3981  | 0.1585 | 0.0293  |         | PAC002399_s                        | 0.4285  | 0.1836 | 0.0181  |
| Family | Muribaculaceae            | 0.1490   | 0.0222 | 0.4319  |         | PAC002444_s                        | 0.4092  | 0.1674 | 0.0248  |
|        | Lachnospiraceae           | 0.1952   | 0.0381 | 0.3012  |         | PAC002447_s                        | -0.3614 | 0.1306 | 0.0498  |
|        | Lactobacillaceae          | -0.3830  | 0.1467 | 0.0367  |         | PAC001119_s                        | 0.3675  | 0.1351 | 0.0457  |
|        | Rikenellaceae             | 0.3502   | 0.1226 | 0.0578  |         | PAC001688_s group                  | 0.3897  | 0.1519 | 0.0333  |
|        | Ruminococcaceae           | 0.0721   | 0.0052 | 0.7052  |         | PAC001382_s                        | 0.3819  | 0.1458 | 0.0373  |
|        | Bacteroidaceae            | -0.3706  | 0.1373 | 0.0438  |         | PAC001684_s                        | 0.4219  | 0.1780 | 0.0202  |
|        | Odoribacteraceae          | 0.0099   | 0.0001 | 0.9587  |         | PAC001666_s                        | 0.5377  | 0.2891 | 0.0022  |
|        | Erysipelotrichaceae       | -0.2478  | 0.0614 | 0.1868  |         | PAC001558_s                        | -0.4757 | 0.2263 | 0.0079  |
|        | Coriobacteriaceae         | -0.2111  | 0.0446 | 0.2627  |         | PAC001668_s                        | 0.4798  | 0.2302 | 0.0073  |
|        | Bifidobacteriaceae        | -0.3735  | 0.1395 | 0.0421  |         | PAC001267_s                        | -0.3882 | 0.1507 | 0.034   |
|        | Peptostreptococcaceae     | -0.2606  | 0.0679 | 0.1642  |         | KE159714_s group                   | -0.5576 | 0.3109 | 0.0014  |
| Genus  | KE159538_g                | 0.348    | 0.1211 | 0.0595  |         | Lactobacillus uc                   | -0.4997 | 0.2497 | 0.0049  |
|        | Alistipes                 | 0.3974   | 0.1579 | 0.0296  |         | AB599946_s                         | -0.5164 | 0.2667 | 0.0035  |
|        | LLKB_g                    | 0.3031   | 0.0919 | 0.1035  |         | PAC001199_s                        | 0.3779  | 0.1428 | 0.0395  |
|        | PAC000186_g               | -0.3553  | 0.1262 | 0.054   |         | KB822463_s                         | -0.6891 | 0.4749 | <0.0001 |
|        | Bacteroides               | -0.3706  | 0.1373 | 0.0438  |         | Bifidobacterium pseudolongum group | -0.3713 | 0.1379 | 0.0434  |
|        | Oscillibacter             | 0.09756  | 0.0095 | 0.608   |         | PAC001589_s                        | -0.4845 | 0.2347 | 0.0067  |
|        | PAC000664_g               | -0.2359  | 0.0556 | 0.2095  |         | PAC001266_s                        | -0.5561 | 0.3092 | 0.0014  |
|        | PAC001127_g               | 0.4285   | 0.1836 | 0.0181  |         | PAC001043_g uc                     | -0.5835 | 0.3405 | 0.0007  |
|        | KE159571_g                | 0.3751   | 0.1407 | 0.0411  |         | Lactobacillus intestinalis         | -0.4075 | 0.1661 | 0.0254  |
|        | Odoribacter               | 0.009914 | 0.0001 | 0.9585  |         | PAC001396_s                        | -0.5827 | 0.3395 | 0.0007  |

|                 |         |        |         |                               |         |        |         |
|-----------------|---------|--------|---------|-------------------------------|---------|--------|---------|
| PAC001092_g     | 0.2075  | 0.0431 | 0.2713  | PAC001294_s                   | -0.374  | 0.1399 | 0.0417  |
| PAC001112_g     | -0.1691 | 0.0286 | 0.3717  | HQ740432_s                    | -0.4601 | 0.2117 | 0.0105  |
| PAC000692_g     | 0.08221 | 0.0068 | 0.6658  | PAC002368_s                   | -0.4516 | 0.2039 | 0.0122  |
| Agathobaculum   | 0.2001  | 0.0400 | 0.2891  | PAC002299_s                   | -0.5816 | 0.3383 | 0.0007  |
| Eubacterium_g17 | 0.4246  | 0.1803 | 0.0193  | PAC001488_s<br>group          | -0.7246 | 0.5250 | <0.0001 |
| Acetatifactor   | -0.1031 | 0.0106 | 0.5877  | Clostridium<br>celatum group  | -0.5599 | 0.3135 | 0.0013  |
| PAC001043_g     | 0.2268  | 0.0514 | 0.228   | PAC001271_s                   | -0.6966 | 0.4853 | <0.0001 |
| PAC001199_g     | 0.3179  | 0.1011 | 0.0869  | Clostridium_uc                | -0.5086 | 0.2587 | 0.0041  |
| Clostridium_g21 | -0.1077 | 0.0116 | 0.5712  | DQ815552_s                    | -0.5894 | 0.3474 | 0.0006  |
| PAC000661_g     | -0.2457 | 0.0604 | 0.1905  | DQ815878_s                    | -0.5101 | 0.2602 | 0.004   |
| Dubosiella      | 0.05326 | 0.0028 | 0.7798  | FJ881246_s                    | -0.6017 | 0.3620 | 0.0004  |
| PAC001091_g     | -0.4245 | 0.1802 | 0.0194  | Lactococcus<br>garvieae group | -0.6324 | 0.3999 | 0.0002  |
| PAC001516_g     | -0.1279 | 0.0164 | 0.5005  | PAC000686_s                   | -0.525  | 0.2756 | 0.0029  |
| KE159605_g      | -0.3407 | 0.1161 | 0.0654  | PAC001090_s                   | -0.586  | 0.3434 | 0.0007  |
| PAC001266_g     | -0.5905 | 0.3487 | 0.0006  | PAC001092_g_uc                | -0.4512 | 0.2036 | 0.0123  |
| Bifidobacterium | -0.3735 | 0.1395 | 0.0421  | PAC001553_s<br>group          | -0.4201 | 0.1765 | 0.0208  |
| PAC001116_g     | -0.451  | 0.2034 | 0.0124  | PAC001588_s                   | -0.5462 | 0.2983 | 0.0018  |
| Roseburia       | -0.6574 | 0.4322 | <0.0001 | PAC001665_s                   | -0.6055 | 0.3666 | 0.0004  |
| PAC001588_g     | 0.03653 | 0.0013 | 0.848   | PAC001902_s                   | -0.5269 | 0.2776 | 0.0028  |
| Lactococcus     | -0.6308 | 0.3979 | 0.0002  |                               |         |        |         |
| PAC001090_g     | -0.586  | 0.3434 | 0.0007  |                               |         |        |         |

Table S8. Effects of NK109 and NS on the fecal microbiota composition at the phylum level in Tg mice

| Taxon Name           | mean $\pm$ SD <sup>1)</sup> |                |                 |                |
|----------------------|-----------------------------|----------------|-----------------|----------------|
|                      | NC                          | Tg             | TgN             | TgS            |
| Bacteroidetes        | 56.7 $\pm$ 8.5              | 46.5 $\pm$ 7.2 | 52.8 $\pm$ 10.5 | 54.2 $\pm$ 6.3 |
| Firmicutes           | 37.9 $\pm$ 8.3              | 45.0 $\pm$ 7.4 | 43.4 $\pm$ 11.3 | 37.0 $\pm$ 7.2 |
| Proteobacteria       | 3.8 $\pm$ 2.0               | 5.1 $\pm$ 3.7  | 1.7 $\pm$ 0.4   | 6.8 $\pm$ 2.6  |
| Tenericutes          | 1.0 $\pm$ 0.6               | 2.9 $\pm$ 2.1  | 1.4 $\pm$ 2.1   | 1.5 $\pm$ 2.4  |
| Cyanobacteria        | 0.3 $\pm$ 0.1               | 0.4 $\pm$ 0.7  | 0.4 $\pm$ 0.6   | 0.2 $\pm$ 0.4  |
| Actinobacteria       | 0.2 $\pm$ 0.2               | 0.1 $\pm$ 0.0  | 0.2 $\pm$ 0.1   | 0.2 $\pm$ 0.2  |
| Deferribacteres      | 0.0 $\pm$ 0.0               | 0.0 $\pm$ 0.0  | 0.0 $\pm$ 0.0   | 0.0 $\pm$ 0.0  |
| Chlamydiae           | 0.0 $\pm$ 0.0               | 0.0 $\pm$ 0.0  | 0.0 $\pm$ 0.0   | 0.0 $\pm$ 0.0  |
| Saccharibacteria_TM7 | 0.0 $\pm$ 0.0               | 0.0 $\pm$ 0.0  | 0.0 $\pm$ 0.0   | 0.0 $\pm$ 0.0  |
| Verrucomicrobia      | 0.0 $\pm$ 0.0               | 0.0 $\pm$ 0.0  | 0.0 $\pm$ 0.0   | 0.0 $\pm$ 0.0  |

<sup>1)</sup>mean  $\pm$  SD

Table S9. Effects of NK109 and NS on the fecal microbiota composition at the family level in Tg mice

| Taxon Name      | mean $\pm$ SD <sup>1)</sup> |                |                 |                |
|-----------------|-----------------------------|----------------|-----------------|----------------|
|                 | NC                          | Tg             | TgN             | TgS            |
| Muribaculaceae  | 41.4 $\pm$ 6.1              | 29.1 $\pm$ 6.3 | 39.8 $\pm$ 8.5  | 39.6 $\pm$ 8.0 |
| Lachnospiraceae | 24.6 $\pm$ 7.6              | 31.9 $\pm$ 5.8 | 31.5 $\pm$ 10.7 | 25.9 $\pm$ 8.8 |
| Bacteroidaceae  | 8.3 $\pm$ 3.2               | 6.9 $\pm$ 2.5  | 3.6 $\pm$ 3.9   | 4.0 $\pm$ 1.7  |
| Ruminococcaceae | 6.2 $\pm$ 2.9               | 6.8 $\pm$ 2.4  | 5.9 $\pm$ 2.4   | 4.7 $\pm$ 2.4  |

|                     |         |         |         |         |
|---------------------|---------|---------|---------|---------|
| Lactobacillaceae    | 3.8±6.2 | 1.9±1.5 | 1.8±1.3 | 1.8±1.5 |
| Christensenellaceae | 2.8±1.1 | 4.0±2.4 | 3.9±1.9 | 4.0±1.7 |
| Prevotellaceae      | 2.8±2.5 | 2.7±1.0 | 3.0±4.0 | 2.3±2.4 |
| Rikenellaceae       | 2.5±0.9 | 4.5±1.6 | 3.5±1.9 | 5.6±3.7 |
| Sutterellaceae      | 1.8±1.4 | 0.1±0.0 | 0.2±0.1 | 0.2±0.3 |
| Desulfovibrionaceae | 1.1±0.7 | 1.1±0.9 | 0.7±0.4 | 0.6±0.6 |
| AC160630 f          | 0.7±0.2 | 0.7±0.6 | 1.0±0.4 | 1.4±0.8 |
| Acholeplasmataceae  | 0.7±0.6 | 0.4±0.7 | 0.2±0.2 | 0.6±1.0 |
| Helicobacteraceae   | 0.6±0.6 | 3.8±3.9 | 0.4±0.3 | 5.7±2.3 |
| Porphyromonadaceae  | 0.6±0.4 | 0.4±0.2 | 0.0±0.0 | 0.2±0.3 |
| Odoribacteraceae    | 0.4±0.5 | 2.1±1.9 | 2.0±2.3 | 1.1±0.6 |
| PAC000197 f         | 0.3±0.5 | 0.0±0.0 | 0.2±0.3 | 0.0±0.1 |
| FR888536 f          | 0.3±0.1 | 0.4±0.7 | 0.4±0.6 | 0.2±.4  |
| Erysipelotrichaceae | 0.2±0.2 | 0.2±0.1 | 0.1±0.1 | 0.3±0.5 |
| Rhodospirillaceae   | 0.2±0.3 | 0.1±.2  | 0.4±0.3 | 0.4±0.5 |
| Coriobacteriaceae   | 0.2±0.1 | 0.1±0.0 | 0.2±.1  | 0.1±.1  |
| Dehalobacterium f   | 0.1±0.1 | 0.2±.1  | 0.1±0.1 | 0.1±0.1 |
| Bifidobacteriaceae  | 0.1±0.1 | 0.0±0.0 | 0.1±0.1 | 0.1±0.2 |
| Mogibacterium f     | 0.1±0.0 | 0.0±0.0 | 0.1±0.0 | 0.0±0.0 |
| Mycoplasmataceae    | 0.0±0.0 | 2.3±1.8 | 1.0±1.9 | 0.8±1.9 |
| Deferribacteraceae  | 0.0±0.0 | 0.0±0.0 | 0.0±0.0 | 0.0±0.0 |

<sup>1)</sup>mean ± SD

Table S10. Effects of NK109 and NS on the fecal microbiota composition at the species level in Tg mice

| Taxon Name                     | AVE ± STD |         |         |         |
|--------------------------------|-----------|---------|---------|---------|
|                                | NC        | Tg      | TgN     | TgS     |
| PAC001077 s                    | 10.9±2.2  | 4.5±3.7 | 9.5±6.3 | 1.1±0.8 |
| PAC002443 s                    | 5.1±2.5   | 3.9±1.5 | 0.7±1.0 | 2.8±2.1 |
| PAC001065 s group              | 4.7±1.5   | 2.6±1.6 | 3.2±2.2 | 3.2±2.7 |
| PAC001770 s                    | 3.3±3.0   | 0.0±0.0 | 1.8±3.8 | 1.5±2.9 |
| PAC002400 s                    | 3.3±1.0   | 0.7±0.8 | 1.1±0.6 | 1.6±1.1 |
| KE159538 s                     | 2.8±2.9   | 0.1±0.0 | 1.5±3.8 | 0.7±0.8 |
| PAC001515 s                    | 2.7±1.6   | 2.9±2.5 | 2.4±1.7 | 1.7±1.6 |
| PAC001071 s                    | 2.6±1.4   | 1.3±1.9 | 1.0±0.8 | 1.4±1.4 |
| PAC001120 s                    | 2.3±6.0   | 0.2±0.3 | 0.0±0.1 | 0.1±0.2 |
| EF097112 s                     | 2.1±1.0   | 0.7±0.3 | 1.0±0.7 | 1.6±1.1 |
| Lactobacillus murinus group    | 2.0±2.9   | 1.7±1.3 | 1.0±0.8 | 1.2±1.2 |
| PAC001066 s                    | 1.9±0.4   | 1.8±2.3 | 1.0±0.9 | 1.1±0.9 |
| PAC001060 s                    | 1.9±0.7   | 1.9±1.7 | 1.9±2.4 | 2.8±2.3 |
| Bacteroides uc                 | 1.8±0.9   | 0.2±0.1 | 0.1±0.1 | 0.1±0.2 |
| PAC000198 s                    | 1.7±0.6   | 1.0±0.7 | 1.8±1.2 | 1.9±1.4 |
| PAC001064 s                    | 1.6±1.0   | 2.3±1.8 | 3.8±2.7 | 3.1±1.1 |
| PAC001070 s group              | 1.6±2.0   | 1.6±1.1 | 1.0±1.5 | 6.0±9.2 |
| PAC001084 s                    | 1.4±2.5   | 0.2±0.4 | 1.8±1.9 | 1.2±1.7 |
| PAC001072 s                    | 1.4±1.4   | 0.7±0.6 | 0.5±0.6 | 1.7±1.5 |
| PAC001139 s                    | 1.3±0.9   | 1.3±0.8 | 1.2±0.9 | 1.9±1.6 |
| PAC002476 s                    | 1.3±0.8   | 0.0±0.0 | 0.0±0.0 | 0.0±0.0 |
| Bacteroides acidifaciens group | 1.3±0.8   | 2.0±2.1 | 1.4±0.9 | 1.1±0.6 |
| PAC002481 s                    | 1.2±1.1   | 2.4±1.1 | 1.1±0.8 | 1.3±1.4 |
| PAC001456 s                    | 1.1±0.6   | 0.4±0.5 | 0.9±0.8 | 0.7±1.0 |

|             |         |         |         |         |
|-------------|---------|---------|---------|---------|
| PAC001079 s | 1.0±0.6 | 0.8±0.9 | 0.5±0.5 | 0.3±0.3 |
|-------------|---------|---------|---------|---------|

<sup>1)</sup>mean ± SD

Table S11. The relationship between differentially enriched gut microbiota composition and spontaneous alteration score in YMT in Tg mice (in the network analysis)

|        | Spontaneous alteration score in Y-maze task | R       | R <sup>2</sup> | P-value |         | Spontaneous alteration score in Y-maze task | R       | R <sup>2</sup> | P-value |
|--------|---------------------------------------------|---------|----------------|---------|---------|---------------------------------------------|---------|----------------|---------|
| Phylum | Bacteroidetes                               | 0.3181  | 0.1012         | 0.0990  | species | PAC002400 s                                 | 0.6245  | 0.3900         | 0.0004  |
|        | Firmicutes                                  | -0.2404 | 0.0578         | 0.2178  |         | Bacteroides uc                              | 0.5648  | 0.3190         | 0.0017  |
|        | Proteobacteria                              | -0.0182 | 0.0003         | 0.9270  |         | PAC002476 s                                 | 0.5814  | 0.3380         | 0.0012  |
|        | Tenericutes                                 | -0.2355 | 0.0555         | 0.2277  |         | PAC002481 s                                 | -0.3894 | 0.1516         | 0.0405  |
|        | Actinobacteria                              | 0.3721  | 0.1385         | 0.0512  |         | PAC001456 s                                 | 0.3819  | 0.1458         | 0.0449  |
|        | Saccharibacteria TM7                        | -0.4306 | 0.1854         | 0.0222  |         | PAC001358 s                                 | 0.3864  | 0.1493         | 0.0423  |
| Family | Muribaculaceae                              | 0.4444  | 0.1975         | 0.0178  |         | HQ793361 s                                  | 0.6093  | 0.3712         | 0.0006  |
|        | Lachnospiraceae                             | -0.2747 | 0.0755         | 0.1571  |         | EF603776 s                                  | 0.4596  | 0.2112         | 0.0139  |
|        | Bacteroidaceae                              | 0.0604  | 0.0036         | 0.7601  |         | PAC002511_s group                           | -0.5051 | 0.2551         | 0.0061  |
|        | Ruminococcaceae                             | -0.0610 | 0.0037         | 0.7580  |         | PAC001731 s                                 | 0.4060  | 0.1648         | 0.0321  |
|        | Christensenellaceae                         | -0.2935 | 0.0861         | 0.1296  |         | PAC001768 s                                 | 0.4596  | 0.2112         | 0.0139  |
|        | Prevotellaceae                              | -0.1767 | 0.0312         | 0.3684  |         | PAC002299 s                                 | 0.4519  | 0.2042         | 0.0158  |
|        | Sutterellaceae                              | 0.5582  | 0.3116         | 0.0020  |         | PAC001764 s                                 | -0.3773 | 0.1424         | 0.0478  |
|        | PAC000197_f                                 | 0.2403  | 0.0577         | 0.2181  |         | PAC001495_s group                           | -0.3951 | 0.1561         | 0.0374  |
|        | Coriobacteriaceae                           | 0.2985  | 0.0891         | 0.1229  |         | PAC000688 s                                 | -0.3909 | 0.1528         | 0.0397  |
|        | Gemella f                                   | -0.5184 | 0.2687         | 0.0047  |         | Bacteroides dorei                           | 0.5531  | 0.3059         | 0.0023  |
| Genus  | Saccharimonas f                             | -0.4306 | 0.1854         | 0.0222  |         | PAC001154 s                                 | -0.6334 | 0.4012         | 0.0003  |
|        | Bacteroides                                 | 0.0584  | 0.0034         | 0.7680  |         | EU505164 s                                  | -0.5057 | 0.2557         | 0.0060  |
|        | PAC002400 g                                 | 0.6329  | 0.4006         | 0.0003  |         | PAC001781 s                                 | 0.3867  | 0.1495         | 0.0421  |
|        | Prevotellaceae uc                           | 0.0106  | 0.0001         | 0.9573  |         | Frisingicoccus uc                           | -0.5762 | 0.3320         | 0.0013  |
|        | Parasutterella                              | 0.5820  | 0.3387         | 0.0012  |         | PAC001099 s                                 | -0.4754 | 0.2260         | 0.0106  |
|        | PAC001456 g                                 | 0.3831  | 0.1468         | 0.0442  |         | PAC002420 s                                 | -0.4537 | 0.2058         | 0.0153  |
|        | PAC000692_g                                 | 0.1520  | 0.0231         | 0.4400  |         | Gemella haemolysans group                   | -0.5184 | 0.2687         | 0.0047  |
|        | PAC001141_g                                 | -0.2329 | 0.0542         | 0.2330  |         | PAC001192_s group                           | -0.3906 | 0.1526         | 0.0399  |
|        | PAC000661 g                                 | -0.0234 | 0.0005         | 0.9061  |         | PAC001653 s                                 | -0.3821 | 0.1460         | 0.0448  |
|        | Frisingicoccus                              | -0.0266 | 0.0007         | 0.8931  |         | PAC001787_s                                 | -0.4440 | 0.1971         | 0.0179  |
|        | PAC001043 g                                 | -0.1783 | 0.0318         | 0.3641  |         | PAC002153 s                                 | -0.5075 | 0.2576         | 0.0058  |
|        | PAC000197 g                                 | 0.2411  | 0.0581         | 0.2164  |         | PAC002422 s                                 | -0.5093 | 0.2594         | 0.0056  |
|        | PAC001199 g                                 | -0.1825 | 0.0333         | 0.3525  |         |                                             |         |                |         |
|        | PAC001402 g                                 | -0.3866 | 0.1495         | 0.0421  |         |                                             |         |                |         |
|        | PAC001266 g                                 | 0.1457  | 0.0212         | 0.4596  |         |                                             |         |                |         |
|        | PAC001457 g                                 | 0.0304  | 0.0009         | 0.8780  |         |                                             |         |                |         |
|        | PAC001468 g                                 | 0.4060  | 0.1648         | 0.0321  |         |                                             |         |                |         |
|        | PAC001270 g                                 | -0.4168 | 0.1737         | 0.0273  |         |                                             |         |                |         |
|        | PAC000748 g                                 | -0.4412 | 0.1947         | 0.0188  |         |                                             |         |                |         |
|        | Gemella                                     | -0.5184 | 0.2687         | 0.0047  |         |                                             |         |                |         |
|        | PAC000677 g                                 | -0.4306 | 0.1854         | 0.0222  |         |                                             |         |                |         |
|        | PAC001637 g                                 | -0.4639 | 0.2152         | 0.0129  |         |                                             |         |                |         |
|        | PAC002153 g                                 | -0.5075 | 0.2576         | 0.0058  |         |                                             |         |                |         |

Table S12. The relationship between differentially enriched gut microbiota composition and exploration score in NORT in Tg mice (in the network analysis)

|        | Exploration score in NORT | R       | R <sup>2</sup> | P-value |         | Exploration score in NORT | R       | R <sup>2</sup> | P-value |
|--------|---------------------------|---------|----------------|---------|---------|---------------------------|---------|----------------|---------|
| Phylum | Bacteroidetes             | 0.2102  | 0.0442         | 0.2831  | species | PAC002400_s               | 0.6382  | 0.4073         | 0.0003  |
|        | Firmicutes                | -0.1214 | 0.0147         | 0.5384  |         | Bacteroides_uc            | 0.6273  | 0.3935         | 0.0004  |
|        | Proteobacteria            | 0.0054  | 0.0000         | 0.9783  |         | PAC002476_s               | 0.6972  | 0.4861         | <0.0001 |
|        | Tenericutes               | -0.3845 | 0.1478         | 0.0433  |         | PAC002481_s               | -0.4039 | 0.1631         | 0.0331  |
|        | Actinobacteria            | 0.3078  | 0.0947         | 0.1111  |         | PAC001456_s               | 0.4433  | 0.1965         | 0.0181  |
|        | Saccharibacteria_TM7      | -0.4154 | 0.1726         | 0.0279  |         | PAC001358_s               | 0.3771  | 0.1422         | 0.0479  |
| Family | Muribaculaceae            | 0.2523  | 0.0637         | 0.1953  |         | HQ793361_s                | 0.6164  | 0.3799         | 0.0005  |
|        | Lachnospiraceae           | -0.1743 | 0.0304         | 0.3750  |         | EF603776_s                | 0.5650  | 0.3192         | 0.0017  |
|        | Bacteroidaceae            | 0.1836  | 0.0337         | 0.3497  |         | PAC002511_s_group         | -0.5083 | 0.2584         | 0.0058  |
|        | Ruminococcaceae           | 0.0451  | 0.0020         | 0.8199  |         | PAC001731_s               | 0.5875  | 0.3452         | 0.0010  |
|        | Christensenellaceae       | -0.2286 | 0.0523         | 0.2419  |         | PAC001768_s               | 0.4882  | 0.2383         | 0.0084  |
|        | Prevotellaceae            | -0.1688 | 0.0285         | 0.3906  |         | PAC002299_s               | 0.5429  | 0.2947         | 0.0028  |
|        | Sutterellaceae            | 0.6109  | 0.3732         | 0.0006  |         | PAC001764_s               | -0.5019 | 0.2519         | 0.0065  |
|        | PAC000197_f               | 0.3192  | 0.1019         | 0.0978  |         | PAC001495_s_group         | -0.4497 | 0.2022         | 0.0164  |
|        | Coriobacteriaceae         | 0.3231  | 0.1044         | 0.0935  |         | PAC000688_s               | -0.4541 | 0.2062         | 0.0152  |
|        | Gemella_f                 | -0.4055 | 0.1644         | 0.0323  |         | Bacteroides_dorei         | 0.5664  | 0.3208         | 0.0017  |
|        | Saccharimonas_f           | -0.4154 | 0.1726         | 0.0279  |         | PAC001154_s               | -0.4262 | 0.1816         | 0.0237  |
|        |                           |         |                |         |         | EU505164_s                | -0.4099 | 0.1680         | 0.0303  |
| Genus  | Bacteroides               | 0.1844  | 0.0340         | 0.3476  |         | PAC001781_s               | 0.6781  | 0.4598         | <0.0001 |
|        | PAC002400_g               | 0.6348  | 0.4030         | 0.0003  |         | Frisingicoccus_uc         | -0.5330 | 0.2841         | 0.0035  |
|        | Prevotellaceae_uc         | 0.0283  | 0.0008         | 0.8864  |         | PAC001099_s               | -0.4086 | 0.1670         | 0.0309  |
|        | Parasutterella            | 0.6831  | 0.4666         | <0.0001 |         | PAC002420_s               | -0.4114 | 0.1692         | 0.0296  |
|        | PAC001456_g               | 0.4389  | 0.1926         | 0.0194  |         | Gemella_haemolysans_group | -0.4055 | 0.1644         | 0.0323  |
|        | PAC000692_g               | 0.1672  | 0.0280         | 0.3952  |         | PAC001192_s_group         | -0.4133 | 0.1708         | 0.0288  |
|        | PAC001141_g               | -0.1723 | 0.0297         | 0.3805  |         | PAC001653_s               | -0.4578 | 0.2096         | 0.0143  |
|        | PAC000661_g               | -0.1553 | 0.0241         | 0.4299  |         | PAC001787_s               | -0.3904 | 0.1524         | 0.0400  |
|        | Frisingicoccus            | -0.0678 | 0.0046         | 0.7316  |         | PAC002153_s               | -0.4814 | 0.2317         | 0.0095  |
|        | PAC001043_g               | -0.3756 | 0.1411         | 0.0489  |         | PAC002422_s               | -0.3816 | 0.1456         | 0.0451  |
|        | PAC000197_g               | 0.3158  | 0.0997         | 0.1016  |         |                           |         |                |         |
|        | PAC001199_g               | -0.2385 | 0.0569         | 0.2216  |         |                           |         |                |         |
|        | PAC001402_g               | -0.3639 | 0.1324         | 0.0570  |         |                           |         |                |         |
|        | PAC001266_g               | 0.1598  | 0.0255         | 0.4167  |         |                           |         |                |         |
|        | PAC001457_g               | 0.1120  | 0.0125         | 0.5704  |         |                           |         |                |         |



|  |             |         |        |        |
|--|-------------|---------|--------|--------|
|  | PAC001468 g | 0.5875  | 0.3452 | 0.0010 |
|  | PAC001270 g | -0.4642 | 0.2155 | 0.0128 |
|  | PAC000748 g | -0.4298 | 0.1847 | 0.0224 |
|  | Gemella     | -0.4055 | 0.1644 | 0.0323 |
|  | PAC000677 g | -0.4154 | 0.1726 | 0.0279 |
|  | PAC001637 g | -0.4554 | 0.2074 | 0.0149 |
|  | PAC002153 g | -0.4814 | 0.2317 | 0.0095 |

## References

1. Yun, S.W.; Kim, J.K.; Lee, K.E.; Oh, Y.J.; Choi, H.J.; Han, M.J.; Kim, D.H. A Probiotic *Lactobacillus gasseri* Alleviates *Escherichia coli*-Induced Cognitive Impairment and Depression in Mice by Regulating IL-1 $\beta$  Expression and Gut Microbiota. *Nutrients* **2020**, *12*, doi:10.3390/nu12113441.
2. Lee, D.Y.; Shin, Y.J.; Kim, J.K.; Jang, H.M.; Joo, M.K.; Kim, D.H. Alleviation of cognitive impairment by gut microbiota lipopolysaccharide production-suppressing *Lactobacillus plantarum* and *Bifidobacterium longum* in mice. *Food Funct* **2021**, *12*, 10750-10763, doi:10.1039/d1fo02167b.
3. Lee, H.J.; Lee, K.E.; Kim, J.K.; Kim, D.H. Suppression of gut dysbiosis by *Bifidobacterium longum* alleviates cognitive decline in 5XFAD transgenic and aged mice. *Sci Rep* **2019**, *9*, 11814, doi:10.1038/s41598-019-48342-7.
4. Jang, H.M.; Lee, H.J.; Jang, S.E.; Han, M.J.; Kim, D.H. Evidence for interplay among antibacterial-induced gut microbiota disturbance, neuro-inflammation, and anxiety in mice. *Mucosal Immunol* **2018**, *11*, 1386-1397, doi:10.1038/s41385-018-0042-3.
5. Kim, J.K.; Choi, M.S.; Jeong, J.J.; Lim, S.M.; Kim, I.S.; Yoo, H.H.; Kim, D.H. Effect of Probiotics on Pharmacokinetics of Orally Administered Acetaminophen in Mice. *Drug Metab Dispos* **2018**, *46*, 122-130, doi:10.1124/dmd.117.077222.
